# Supplementary material for: Uracil DNA Glycosylase Counteracts APOBEC3G-Induced Hypermutation of Hepatitis B Viral Genomes: Excision Repair of Covalently Closed Circular DNA
Source: PubMed Central journal article supplement (PMC3656096; doi:10.1371/journal.ppat.1003361), 2013-05-16
Supplement: ppat.1003361.s007.pdf [file ppat.1003361.s007.pdf]

**Table S1. Vector list**

| Name                | Description                                                                                                                                                                                                                                                                                                  | Reference  |
|---------------------|--------------------------------------------------------------------------------------------------------------------------------------------------------------------------------------------------------------------------------------------------------------------------------------------------------------|------------|
| pHBV1.5             | A replication-competent HBV (adw2) plasmid, in which the HBV pgRNA is driven by endogenous HBV promoter.                                                                                                                                                                                                     | [40][41]   |
| pPB                 | A replication-competent HBV (adw R9) plasmid, in which the HBV pgRNA is driven by CMV promoter.                                                                                                                                                                                                              | [44]       |
| pCSD3.5             | A replication-competent DHBV (DHBV3) plasmid, in which the DHBV pgRNA is driven by CMV promoter.                                                                                                                                                                                                             | [49]       |
| pCSD3.5ΔS           | Three point mutations were introduced in pCSD3.5 to create in-frame stop codons at positions 1327, 1346, and 1349 in the surface protein ORF [49].                                                                                                                                                           | This study |
| pCSD3.5ΔP           | A BamHI fragment (210bp) was deleted from pCSD3.5, resulting in desruption of functional P gene.                                                                                                                                                                                                             | This study |
| pIRES-UGI           | An UGI expression vector kindly gifted by Dr. Neuberger.                                                                                                                                                                                                                                                     | [51]       |
| UGI-pFERp           | An open reading frame of UGI was amplified by PCR with 5'-CTGAATTCATGACAAATTTATCT-3' and 5'-CTGGATCCGCTAACATTTTAATTTTA-3' primers and cloned into pFERp. After puromycin selection, this retrovirus vector stably expresses UGI-flag-ER chimeric protein.                                                    | This study |
| pFERp               | AID cassette of pFB-AIDER-ires-puro retrovirus vector [38, 71] was replaced with a synthetic DNA linker containing multi-cloning site to make a mock retrovirus vector and designated as pFERp.                                                                                                              | This study |
| mock-pFERp          | Two oligonucleotides (5'-AATTCTAGCACCATGGCTAAG-3', 5'-GATCCTTAGCCATGGTGCTAG-3') containing an in-frame ATG were hybridized and inserted in an EcoRI/BamHI site of the pFERp retroviral vector. After puromycin selection, this retrovirus vector stably expresses flag-ER chimeric protein.                  | This study |
| pFLAG-GFP           | A GFP2 ORF fragment from pGFP2N3 (Biosignal Packard) is inserted into pCMV3Tag2B (Invitrogen).                                                                                                                                                                                                               | This study |
| pFLAG-A3G           | Human A3G cDNA fragment amplified by PCR with 5'-AGGAATTCATGAAGCCTCACTT-3' and 5'-CCCCTCGA GCTAGTTTTCTGATTCTGGA-3' primers was cloned into pcDNA3Tag1A (Invitrogen) and pEGFP-C2 (Clontech).                                                                                                                 | This study |
| pEGFP-A3G           | see pFlag-A3G                                                                                                                                                                                                                                                                                                | This study |
| pcDNA3/HA-A3G       | kindly gifted by Dr.Takaori.                                                                                                                                                                                                                                                                                 | [72]       |
| pcDNA3/HA-E67QE259Q | A catalytic-inactive mutant A3G vector kindly gifted by Dr.Takaori.                                                                                                                                                                                                                                          | [72]       |
| pGFP-UNG2           | Human UNG2 ORF amplified by PCR with 5'-TCGAATTCATGATCGGCCAGAAGACG-3' and 5'-TTTTCTCGAGT CACAGCTCCTTCCA-3' primers was cloned into pEGFP-C2.                                                                                                                                                                 | This study |
| pDsRed-NLS          | Two copies of synthetic DNAs (hybridized oligonucleotides, 5'-TCGAGATCCAAAAAAGAAGAGAAAGGTAAGTTCG-3' and 5'-AATTCGAAGTACCTTTCTCTTTTGGATC-3', or 5'-GATCCAAAAAAGAAGAGAAAGGTAG-3' and 5'-GATCTACCTTTCTCTTTTGG-3') encoding SV40 nuclear localization signal (NLS) was cloned into pDsRed monomer-C1 (Clontech). | This study |

71. Nagaoka H, Ito S, Muramatsu M, Nakata M, Honjo T (2005) DNA cleavage in immunoglobulin somatic hypermutation depends on de novo protein synthesis but not on uracil DNA glycosylase. *Proc Natl Acad Sci U S A* 102: 2022-2027.

72. Shindo K, Takaori-Kondo A, Kobayashi M, Abudu A, Fukunaga K, et al. (2003) The enzymatic activity of CEM15/Apobec-3G is essential for the regulation of the infectivity of HIV-1 virion but not a sole determinant of its antiviral activity. *J Biol Chem* 278: 44412-44416.
