# Supplementary material for: Uracil DNA Glycosylase Counteracts APOBEC3G-Induced Hypermutation of Hepatitis B Viral Genomes: Excision Repair of Covalently Closed Circular DNA
Source: PubMed Central journal article supplement (PMC3656096; doi:10.1371/journal.ppat.1003361), 2013-05-16
Supplement: ppat.1003361.s008.pdf [file ppat.1003361.s008.pdf]

**Table S2. Primer list**

| Name                                 | Sequence (5'→3')                     |
|--------------------------------------|--------------------------------------|
| Mutation analysis                    | (Y = C or T, R = G or A)             |
| HBV 1st fwd                          | CGGAAATATACATCGTTTCCAT               |
| HBV 1st rev                          | AAGAGTYTYTTATGTAAGACYTT              |
| HBV 2nd fwd                          | ATGGCTGCTARGCTGTAAGCCAA              |
| HBV 2nd rev                          | AAGTGCACACGGAYYGGCAGAT               |
| DHBV P gene fwd (pol-f)              | GCGGGCTCCCCTCTCCCAC                  |
| DHBV P gene rev (pol-r)              | CTGGATGGGCCGTCAGCAGGATTATA           |
| DHBV cccDNA fwd (ccc-f)              | CCTGATTGGACGGCTTTTCC                 |
| DHBV cccDNA rev (ccc-r)              | CATTCTGCCGGCAAGTTGATTTAA             |
| DHBV full fwd                        | TGACTGTACCTTTGGTATGTACCA             |
| DHBV full rev                        | GTAGACGTAAAGATACCTTG                 |
| neo-f                                | TTGGGTGGAGAGGCTATTTCG                |
| neo-r                                | GCGGATACCGTAAAGCACGA                 |
| RCA                                  | (* = modified with phosphorothioate) |
| DHBV179RCAf                          | ATTGAAGCAATCAC*T*                    |
| DHBV1069RCAf                         | CGAAGAAGATCAAA*A*                    |
| DHBV1827RCAf                         | CACCGAAATCAGAT*T*                    |
| DHBV2610RCAf                         | TTGGTATGTACCAT*T*                    |
| DHBV1RCAr                            | TTTCAAATGAGCAT*G*                    |
| DHBV786RCAr                          | CAGGAATTTGATGT*T*                    |
| DHBV1587RCAr                         | AGCTTTCCTAAAAT*A*                    |
| DHBV2330RCAr                         | TCTGATAACGTTTG*T*                    |
| qPCR                                 |                                      |
| HBV fwd                              | GAATTGATGACTCTAGCTACCTG              |
| HBV rev                              | GAAACCACAATAGTTGCCTGATC              |
| DHBV fwd                             | CAGCCTCAGTGGACTCCCGA                 |
| DHBV rev                             | GGCACAGCTGGTTCCGTCTGG                |
| A3A fwd                              | ATGGCATTGGAAGGCATAAG                 |
| A3A rev                              | CAAAGAAGGAACCAGGTCCA                 |
| A3B fwd                              | TTCGAGGCCAGGTGTATTTCA                |
| A3B rev                              | CAGAGATGGTCAGGGTGACA                 |
| A3C fwd                              | CAACGATCGGAACGAACTT                  |
| A3C rev                              | TATGTCGTTCGAGAACCAAG                 |
| A3D fwd                              | ACCCAAACGTCAGTCGAATC                 |
| A3D rev                              | GCTCAGCCAAGAATTTGGTC                 |
| A3F fwd                              | GAAACACAGTGGAGCGAATG                 |
| A3F rev                              | GAAATGGGGCTCTGATGAAAG                |
| A3G fwd                              | GGTCAGAGGACGGCATGAGA                 |
| A3G rev                              | GCAGGACCCAGGTGTCATTG                 |
| A3H fwd                              | CCCGCCTGTACTACCACTGG                 |
| A3H rev                              | GGGTTGAAGGAAAGCGGTTT                 |
| AICDA fwd                            | AAATGTCCGCTGGGCTAAGG                 |
| AICDA rev                            | GGAGGAAGAGCAATTCCACGT                |
| HPRT fwd                             | GCCCTGGCGTCGTGATTAGT                 |
| HPRT rev                             | CGAGCAAGACGTTTCAGTCCTGTC             |
| DHBV preC fwd                        | CCTGATTGGACGGCTTTTCC                 |
| DHBV preC rev                        | GTAGACGTAAAGATACCTTG                 |
| DHBV-specific primer for RT reaction | GTAATGCCACCAAAGCAATCTCC              |
